# Supplementary material for: Protective Effect of Oral BCG and Inactivated Mycobacterium bovis Vaccines in European Badgers (Meles meles) Experimentally Infected With M. bovis
Source: Front Vet Sci. 2020 Feb 4;7:41. doi: 10.3389/fvets.2020.00041 (PMC7011093; doi:10.3389/fvets.2020.00041)
Supplement: Supplementary file 2 [file Table_2.XLSX]

## Sheet: Sheet1
Post-Mortem gross lesion Scores
Treatment	Chip ID	Lung						Thoracic LN					Ex Thoracic LN														Other										Total
		Left Cranial Lung Lobe	Left Caudal Lung Lobe	Right Cranial Lung Lobe	Right Middle Lung Lobe	Right Caudal Lung Lobe	Accessory Lung Lobe	Anterior Mediastinal LN	Left Bronchial LN		Posterior Mediastinal LN	Right Bronchial LN	Left Mandibular LN	Right Mandibular LN	Left Parotid LN	Right Parotid LN		Left Retropharyngeal LN	Right Retropharyngeal LN	Land RAxillary LNChains	Land RInguinal LNChains	Land RPopliteal LN		Hepatic LN	Mesenteric LN	Tonsils	Pleura Mediastinum	Spleen	Liver	Heart	Kidneys	Salivary Gland	Tracheal Swab	Trachea in pot	Heart Serum	Embryo	Overall Score
Control	SHK-0369	1	4	0	0	0	0	0	1		0	2	0	0	0	0		0	2	0	0	0		0	0	0	2	0	0	0	0	0					12
Control	SHK-1464	4	4	1	4	4	0	0	4		4	3	0	0	0	0		2	3	0	0	0		3	0	0	4	0	0	0	0	0					40
Control	SHK-2191	0	3	1	3	1	3	0	0		3	1	0	0	0	0		0	0	0	0	0		2	0	0	0	0	0	0	0	0					17
Control	SHK-5338	0	4	0	3	0	0	0	0		3	3	0	0	0	0		0	3	1	0	0		3	0	0	2	0	1	3	0	0					26
Control	SHK-5360	3	3	3	4	3	1	0	1		0	4	0	0	0	0		0	0	1	0	0		1	0	0	1	0	0	0	0	0					25
Control	SHK-0866	4	0	4	4	4	0	0	1		2	3	0	0	0	0		0	0	0	0	0		3	0	0	2	0	0	0	0	0					27
Control	SHK-1500	4	4	4	4	4	0	0	3		4	4	0	0	0	0		0	0	0	0	0		1	0	0	4	0	0	0	0	0					36
Control	SHK-1661	1	0	0	4	0	0	0	0		0	4	0	0	0	0		0	0	0	0	0		0	0	0	4	0	0	0	0	0					13
Control	SHK-3959	1	3	1	4	1	1	0	0		2	4	0	0	0	0		0	0	0	0	0		2			4	0	1	0	0	0					24
Control	SHK-5225	1	0	1	4	1	0	0	0		2	4	0	0	0	0		0	0	0	0	0		1	0	0	3	0	0	0	0	0					17
Control	SHK-8248	1	1	4	4	4	0	0	2		4	3	0	0	0	0		0	0	0	0	0		3	0	0	4	0	0	0	0	0					30
Control	SHK-9761	0	0	0	4	0	0	0	0		0	2	0	0	0	0		0	0	0	0	0		0	0	0	2	0	0	0	0	0					8
BCG	SHK-2966	0	0	0	0	0	0	0	0		3	2	0	0	0	0		0	0	0	0	0		3	0	0	0	0	0	0	0	0					8
BCG	SHK-5179	3	0	3	1	3	1	0	0		1	2	0	0	0	0		0	0	0	0	0		0	0	0	0	0	0	0	0	0					14
BCG	SHK-5296	0	3	0	1	0	0	0	2		3	2	0	0	0	0		0	0	0	0	0		1	0	0	0	0	0	0	0	0					12
BCG	SHK-5770	0	0	0	4	0	0	0	0		3	0	0	0	0	0		0	0	1	0	0		3	1	0	1	0	0	0	0	0					13
BCG	SHK-9538	0	0	0	0	0	0	0	0		0	0	0	0	0	0		0	0	0	0	0		2	0	0	0	0	0	0	0	0					2
HIMB	SHK-3902	0	0	0	0	0	0	0	3		0	0	0	0	0	0		0	0	0	0	0		0	0	0	0	0	0	0	0	0					3
HIMB	SHK-4327	0	0	0	0	0	0	0	0		0	0	0	0	0	0		0	0	0	0	0		0	0	0	0	0	0	0	0	0					0
HIMB	SHK-7228	0	0	0	1	0	0	0	1		1	4	0	0	0	0		0	0	0	0	0		4	0	0	1	3	3	0	0	0					18
HIMB	SHK-7603	3	0	0	4	1	0	0	0		4	3	0	0	0	0		0	0	0	0	0		0	0	0	2	0	0	0	0	0					17
HIMB	SHK-8739	0	0	0	4	0	0	0	0		2	4	0	0	0	0		0	0	0	0	0		1	0	0	0	0	0	0	0	0					11
HIMB	SHK-9413	0	0	0	4	0	0	0	0		0	4	0	0	0	0		0	0	0	0	0		0	0	0	0	0	0	0	0	0					8
HIMB	SHK-9980	3	0	0	3	0	0	0	3		3	1	0	0	0	0		0	0	0	0	0		1		0	0	0	1	0	0	0					15
