# Supplementary material for: Protective Effect of Oral BCG and Inactivated Mycobacterium bovis Vaccines in European Badgers (Meles meles) Experimentally Infected With M. bovis
Source: Front Vet Sci. 2020 Feb 4;7:41. doi: 10.3389/fvets.2020.00041 (PMC7011093; doi:10.3389/fvets.2020.00041)
Supplement: Supplementary file 3 [file Table_3.XLSX]

## Sheet: Sheet1
Total bacterial load (CFU/gr of tissue)
Treatment	Chip ID	Thoracic LN				Ex Thoracic LN												Other
		Left Bronchial LN	Posterior Mediastinal LN	Right Bronchial LN	Left Mandibular LN	Right Mandibular LN	Left Parotid LN	Right Parotid LN	Left Retropharyngeal LN	Right Retropharyngeal LN	Land RAxillary LNChains	Land RInguinal LNChains	Land RPopliteal LN	Hepatic LN	Mesenteric LN	Tonsils	Pleura Mediastinum	Spleen	Liver	Heart	Kidneys	Trachea	Salivary Gland
Control	SHK-0369	0	0	52119.7	0	0	0	0	0	0	0	0	0	367.081	0	0	50.5051	POS*	0	0	0	0	0
Control	SHK-1464	2783.38	16383	117.324	0	POS*	4242.42	POS*	968.801	4754.9	472.313	0	0	4275.15	2327.94	0	5314.53	16.3532	13.7552	0	0	0	0
Control	SHK-2191	0	10569.4	1851.85	0	0	0	0	0	0	0	0	0	POS*	0	0	0	0	0	0	0	0	0
Control	SHK-5338	225.23	87.26	258812	0	0	0	0	0	0	290.698	0	0	16954	597.48	0	1860.96	42.1585	41.2541	0	0	0	0
Control	SHK-5360	0	9459.46	329486	0	0	0	202.02	0	0	0	0	0	266667	0	0	POS*	0	0	POS*	0	POS*	0
Control	SHK-0866	0	1307.14	8154.01	0	0	0	0	0	65.839	0	0	0	217.51	0	0	48.0307	25.74	0	0	0	0	0
Control	SHK-1500	0	3974.18	37488.6	0	0	0	0	0	111.576	314.302	0	0	58.0046	0	0	72	0	0	0	0	0	0	TB pre+
Control	SHK-1661	0	0	34428.9	0	0	0	0	0	0	0	0	0	259.217	0	0	110.132	0	0	0	0	0	0
Control	SHK-3959	0	20295.9	36279.7	740.741	259.74	2741.94	0	0	0	0	0	0	15777.6	1186.1	0	3400.81	12.5	92.3295	0	0	0	0
Control	SHK-5225	0	538.462	35226.7	0	0	0	0	0	0	0	0	0	0	0	0	746.269	7.70668	0	0	0	0	0
Control	SHK-8248	220.458	32472.5	61974.7	0	0	0	0	252.123	3077.98	0	0	0	71.6538	0	0	263.952	5.63444	0	0	0	40.5797	0
Control	SHK-9761	0	8974.36	76182.4	0	0	0	0	0	17.8063	0	0	0	5005.28	82.5083	0	151.515	0	0	0	0	0	0
BCG	SHK-2966	0	0	2169.81	0	0	0	0	0	0	0	0	0	0	0	0	0	0	0	0	0	0	0
BCG	SHK-5179	0	1443.66	10000	0	0	0	0	0	POS*	0	0	0	0	0	0	0	0	0	0	0	0	0
BCG	SHK-5296	0	183.673	1134.02	0	0	0	0	POS*	POS*	0	0	0	64.7249	0	0	0	0	0	0	0	0	0	TB pre+
BCG	SHK-5770	0	268817	6052.63	0	0	0	0	0	0	0	18.73	0	12425.8	283.951	0	428.571	0	0	0	0	0	0
BCG	SHK-9538	0	251.572	27810.9	0	0	0	0	0	0	0	0	0	108.043	0	0	0	0	0	0	0	0	0
HIMB	SHK-3902	0	481.928	6535.09	0	0	0	0	0	0	0	0	0	0	0	0	0	0	0	0	0	0	0
HIMB	SHK-4327	5747.13	30.1932	20997.2	0	0	0	0	0	0	0	0	0	372.238	POS*	0	0	0	0	0	0	0	0
HIMB	SHK-7228	202.703	937.5	18204.3	0	0	0	0	205.993	0	POS*	0	POS*	0	229.852	0	53.1915	178784	10802.8	0	0	0	0
HIMB	SHK-7603	404605	5241.46	576.08	0	0	0	0	513.447	0	0	0	0	0	46.3894	0	POS*	0	0	0	0	0	0
HIMB	SHK-8739	2538.63	71531.5	1.92308e+06	0	0	0	0	2263.72	75.3012	0	0	0	1096.77	75.7904	944.444	0	0	0	0	0	0	0	TB pre+
HIMB	SHK-9413	0	116.959	114679	0	0	1190.48	0	0	0	0	0	0	5127.16	0	0	0	0	0	0	220.496	0	0
HIMB	SHK-9980	572519	182614	121655	238.095	0	0	183038	14741	18129.8	43333.3	52262.8	8092.95	45056.9	2732.88	0	27.6549	178.947	187.436	POS*	22768.7	0	0	TB pre+
			* It was only isolated in MGIT tube. Modified 7H11 agar plates were negative
